# Supplementary material
Source: PubMed Central journal article supplement (PMC4324165)
Supplement: NIHMS650932-supplement-1.pdf [file NIHMS650932-supplement-1.pdf]

## Supplemental Figure 1

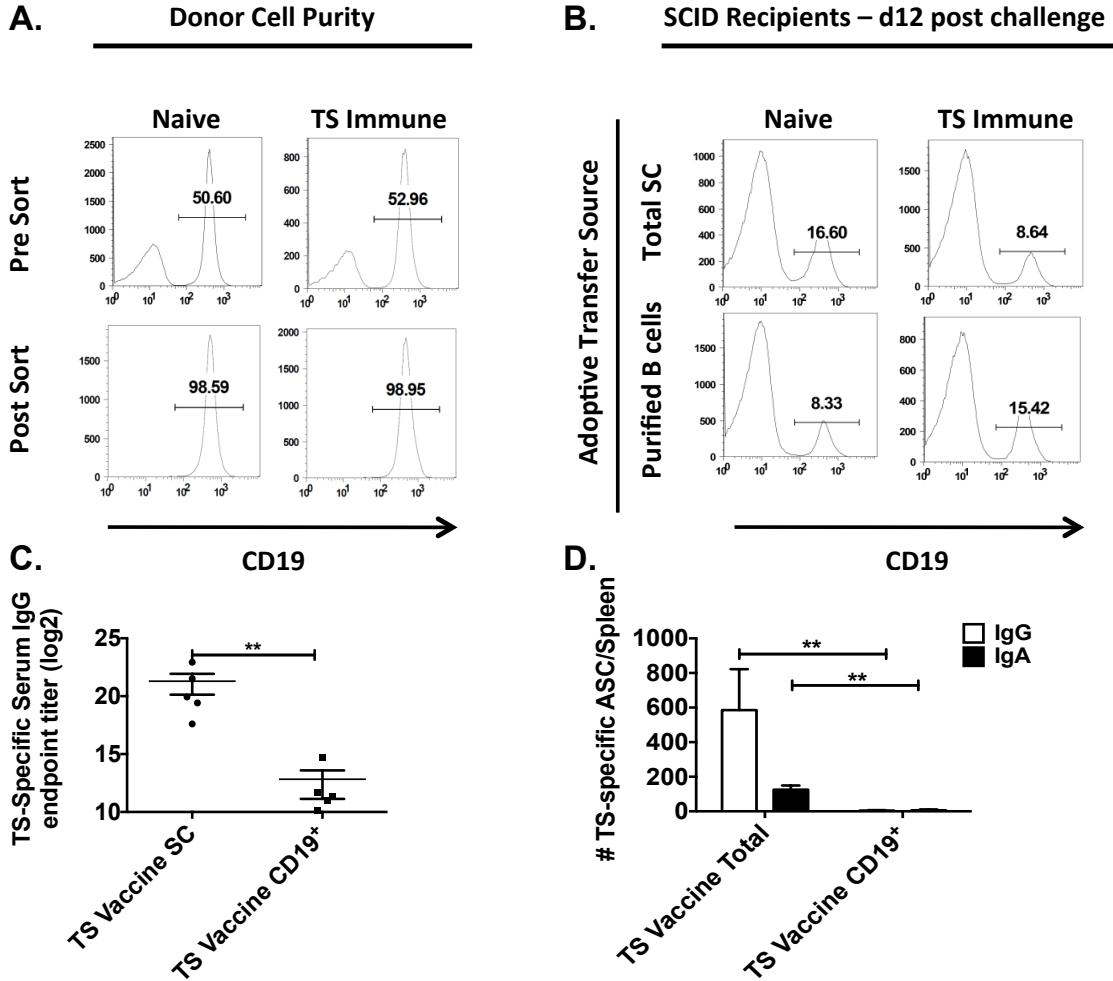

1

### 2 Supplemental Figure 1: B cells need T cell help to become fully activated.

3 Ten to twenty Tc immune and naïve BALB/c mice were sacrificed, splenocytes  
 4 pooled together from each group and either used for total SC transfer or CD19<sup>+</sup> T  
 5 cells were purified from SC using CD19<sup>+</sup> microbeads (Miltenyi Biotec). **(A)** The  
 6 percentages of CD19<sup>+</sup> B cells were assessed pre- and post-sort. Cells were  
 7 stained with anti-CD8 FITC, anti-CD3 PE, anti-CD4 PerCP and anti-CD19 PE-  
 8 Cy7 and analyzed with a LSR II Flow cytometer and FlowJo software. One  
 9 mouse spleen equivalent of total or purified B cells from Tc immune or naïve  
 10 BALB/c mice were transferred i.v. into naïve SCID mice. One day later, these

11 mice were orally challenged with *T. cruzi*. Twelve days later, recipient mice were  
12 sacrificed and assessed for **(B)** the percentage of CD19<sup>+</sup> B cells in the spleen,  
13 **(C)** levels of TS-specific serum IgG via Elisa and the **(D)** absolute number of TS-  
14 specific IgG and IgA antibody secreting cells (ASC) per spleen. N=5 mice/group.  
15 \*\* p < 0.01, Mann-Whitney U test.

16

17

18

19

20

21

22

23

24

25

26

27

28

29

30

31

32

## Supplemental Figure 2

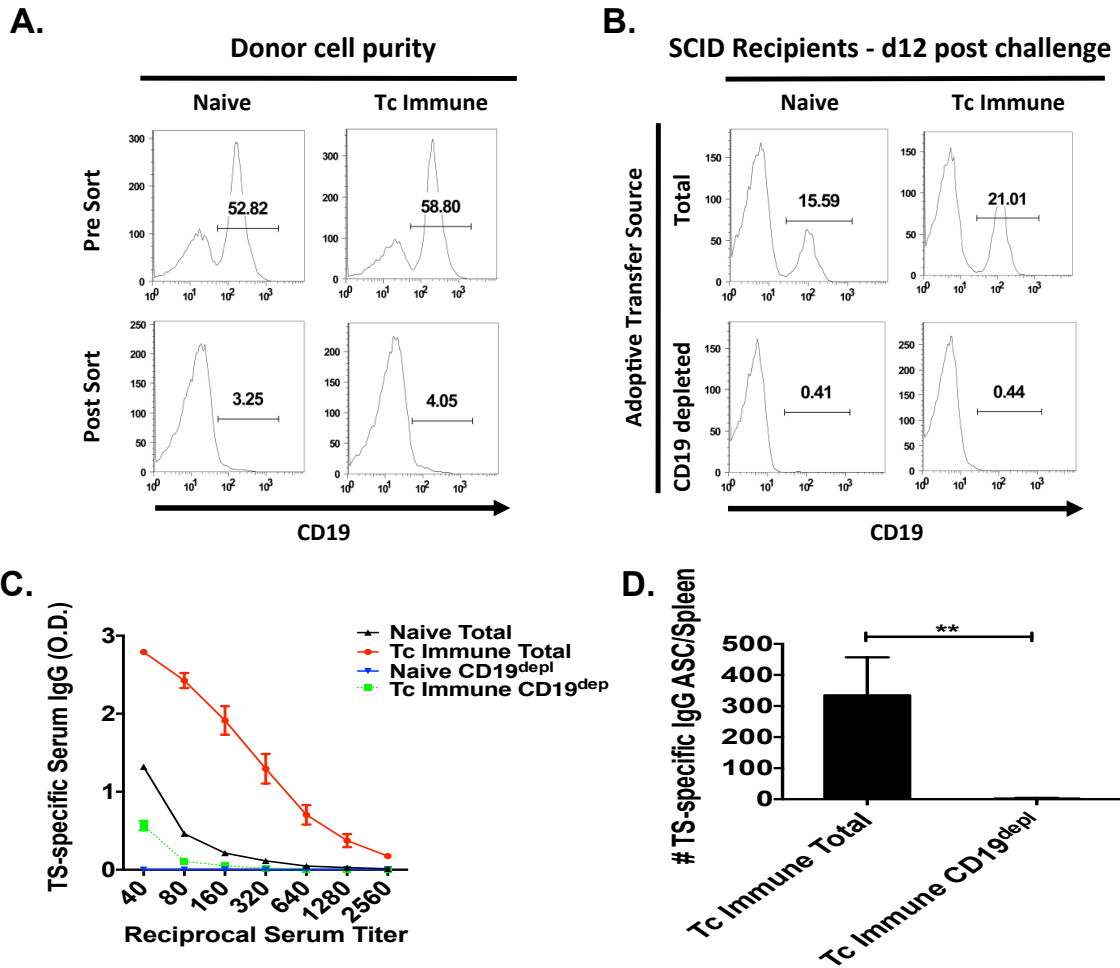

33

34

35 **Supplemental Figure 2: Highly depleted CD19<sup>+</sup> T cells used for adoptive**  
 36 **transfer studies.** Five to ten Tc immune and naïve BALB/c mice were sacrificed,  
 37 splenocytes pooled together from each group and CD19<sup>+</sup> B cells depleted using  
 38 CD19<sup>+</sup> microbeads (Miltenyi Biotech). **(A)** The percentages of CD19<sup>+</sup> B cells  
 39 were assessed pre-sort and post-sort. Cells were stained with anti-CD8 FITC,  
 40 anti-CD3 PE, anti-CD4 PerCP and anti-CD19 PE-Cy7 and analyzed with a LSR II  
 41 Flow cytometer and FlowJo software. One mouse SC+dLN equivalent of total or  
 42 CD19<sup>+</sup> depleted SC+dLN cells from Tc immune and naïve BALB/c mice were

43 transferred i.v. into naïve SCID mice. One day later, these mice were orally  
44 challenged with *T. cruzi*. Recipient SCID mice were sacrificed 12 days later and  
45 assessed for **(B)** CD19<sup>+</sup> B cells in the spleen via flow cytometry, **(C)** *T. cruzi*-  
46 specific serum IgG via ELISA, and **(D)** *T. cruzi*-specific IgG antibody secreting  
47 cells (ASC) via ELISPOT. n=5 mice/group. \* p < 0.01, Mann-Whitney U test.  
48 Data are representative of two independent experiments with similar results.  
49 Error bars represent SEM.

50

51

52

53

54

55

56

57

58

59

60

61

62

63

64

### Supplemental Figure 3

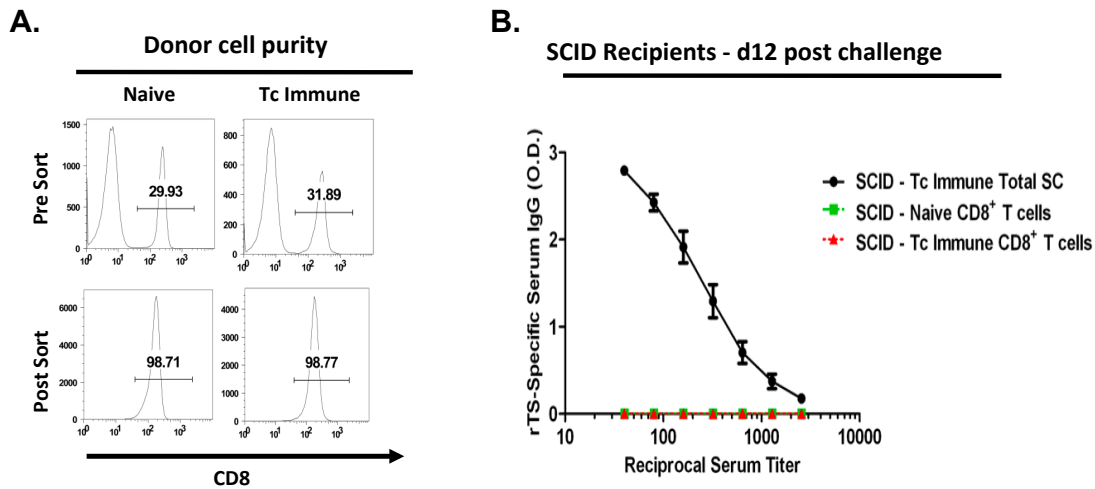

65

### 66 Supplemental Figure 3: Highly purified CD8<sup>+</sup> T cells used for adoptive

67 transfer studies. Five to ten Tc immune and naïve BALB/c mice were sacrificed,

68 splenocytes and gastric LN cells pooled together from each group and CD8<sup>+</sup> T

69 cells purified using CD8<sup>+</sup> microbeads (Miltenyi Biotech). (A) The percentages of

70 CD8<sup>+</sup> T cells were assessed pre-sort and post-sort. Cells were stained with anti-

71 CD8 FITC, anti-CD3 PE, anti-CD4 PerCP and anti-CD19 PE-Cy7 and analyzed

72 with a LSR II Flow cytometer and FlowJo software. One mouse spleen/gastric

73 LN equivalent of purified CD8<sup>+</sup> T cells (> 98% CD8<sup>+</sup>) from Tc immune and naïve

74 BALB/c mice were transferred i.v. into naïve SCID mice. One day later, these

75 mice were orally challenged with *T. cruzi*. (B) Recipient SCID mice were

76 sacrificed 12 days following *T. cruzi* challenge and serum was collected from

77 individual mice. TS-specific serum IgG was measured from recipient mice via

78 ELISA. Serum samples previously collected from SCID mice receiving *T. cruzi*-

79 specific total SC were used as positive controls. N=4 mice/group. Data are

80 representative of two independent experiments with similar results.

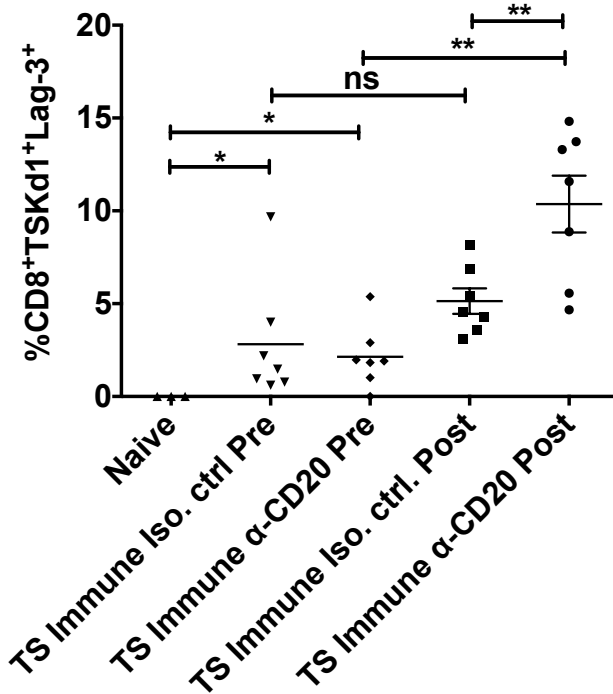

81

82 **Supplemental Figure 4: B cells are important for the prevention of CD8<sup>+</sup> T**

83 **cell exhaustion in our TS immune model.** B cell depleted ( $\alpha$ -CD20) and

84 isotype control treated BALB/c mice were vaccinated first with TS-DNA i.m.

85 twice, two weeks apart, rested for one month, and then vaccinated with Adeno-

86 TS i.n. and s.c. twice, two weeks apart. Mice were treated with  $\alpha$ -CD20 or

87 isotype control antibody every 2-3 weeks for the duration of the study and

88 assessed for B cell depletion via flow cytometry and *T. cruzi*-specific serum IgG

89 via ELISA (data not shown). Approximately 4 months after the last vaccination,

90 naïve and TS immune mice were systemically challenged with *T. cruzi* BFT s.c.

91 **(A)** Prior to (pre) and fifteen days after systemic challenge (post), mice were bled

92 and the percentage of CD8<sup>+</sup>TSKd1<sup>+</sup>Lag-3<sup>+</sup> T cells measured via flow cytometry.

93 N=3-7 mice/group. \*  $p < 0.05$ , \*\*  $p < 0.01$  Mann-Whitney U test. Data are

94 representative of two independent experiments with similar results. Error bars  
95 represent SEM.

96

97
